# Supplementary material for: Chinese Eye Exercises and Myopia Development in School Age Children: A Nested Case-control Study
Source: Springer Nature journal article supplement (doi:10.1038/srep28531), 2016-06-22
Supplement: 41598_2016_BFsrep28531_MOESM60_ESM.pdf [file 41598_2016_BFsrep28531_MOESM60_ESM.pdf]

# Chinese Eye Exercises and Myopia Development in School

## Age Children: A Nested Case-control Study

Meng-Tian Kang MD<sup>1</sup>, Shi-Ming Li MD PhD<sup>1\*</sup>, Xiaoxia Peng MD PhD<sup>3</sup>, Lei Li MD<sup>1</sup>,  
Anran Ran MD<sup>1</sup>, Bo Meng MD PhD<sup>1</sup>, Yunyun Sun MD<sup>1</sup>, Luo-Ru Liu, MD<sup>3</sup>, He Li, MD<sup>3</sup>,  
Michel Millodot OD PhD<sup>4</sup>, Ningli Wang MD PhD<sup>1\*</sup>

1. Beijing Tongren Eye Center, Beijing Tongren Hospital, Beijing Ophthalmology Visual Science Key Lab, Beijing Institute of Ophthalmology, Capital Medical University, Beijing, China
2. Department of Epidemiology and Biostatistics, School of Public Health and Family Medicine, Capital Medical University, Beijing, China.
3. Anyang Eye Hospital, Henan Province, China.
4. School of Optometry and Vision Sciences, Cardiff University, Cardiff, United Kingdom

Supplement file 1. Standard Chinese Eye Exercises assessment form

### Part I Press and knead BL2 (cuanzhu) (8 points)

| Item                   |                                          | Score         |              |
|------------------------|------------------------------------------|---------------|--------------|
| Manipulation           | Manipulate with thumb                    | Yes (1 point) | No (0 point) |
|                        | Manipulate with fingertip                | Yes (1 point) | No (0 point) |
|                        | Manipulate in pressing and kneading      | Yes (1 point) | No (0 point) |
|                        | Manipulation diameter $\leq 2$ fingertip | Yes (1 point) | No (0 point) |
| Acupoint Location      | At the median end of the eyebrow         | Yes (1 point) | No (0 point) |
|                        | In the supraorbital notch                | Yes (1 point) | No (0 point) |
| Strength Effectiveness | Sense of sore (Qi)                       | Yes (1 point) | No (0 point) |
| Rhythm                 | One movement in a beat                   | Yes (1 point) | No (0 point) |

### Part II Press and nip BL1 (jingming) (8 points)

| Item | Score |
|------|-------|
|------|-------|

|                        |                                                    |               |              |
|------------------------|----------------------------------------------------|---------------|--------------|
| Manipulation           | Manipulate with index finger                       | Yes (1 point) | No (0 point) |
|                        | Manipulate with fingertip                          | Yes (1 point) | No (0 point) |
|                        | Manipulate in pressing and nipping                 | Yes (1 point) | No (0 point) |
|                        | Manipulation diameter $\leq 2$ fingertip           | Yes (1 point) | No (0 point) |
| Acupoint Location      | In the depression slightly above the inner canthus | Yes (1 point) | No (0 point) |
|                        | Nip bone instead of skin                           | Yes (1 point) | No (0 point) |
| Strength Effectiveness | Sense of sore (Qi)                                 | Yes (1 point) | No (0 point) |
| Rhythm                 | One movement in a beat                             | Yes (1 point) | No (0 point) |

### Part III Press and knead ST2 (sibai) (8 points)

| Item                   |                                               | Score         |              |
|------------------------|-----------------------------------------------|---------------|--------------|
| Manipulation           | Manipulate with index finger                  | Yes (1 point) | No (0 point) |
|                        | Manipulate with fingertip                     | Yes (1 point) | No (0 point) |
|                        | Manipulation diameter $\leq 2$ fingertip      | Yes (1 point) | No (0 point) |
|                        | Manipulate in pressing and kneading           | Yes (1 point) | No (0 point) |
| Acupoint Location      | Directly below the pupil                      | Yes (1 point) | No (0 point) |
|                        | In the depression of the infraorbital foramen | Yes (1 point) | No (0 point) |
| Strength Effectiveness | Sense of sore (Qi)                            | Yes (1 point) | No (0 point) |
| Rhythm                 | One movement in a beat                        | Yes (1 point) | No (0 point) |

### Part IV Press and knead EX-HN5 (taiyang),scrape orbit (16 points)

| Item                   |                   | Score                                                        |               |              |
|------------------------|-------------------|--------------------------------------------------------------|---------------|--------------|
| Press and knead EX-HN5 | Manipulation      | Manipulate with thumb                                        | Yes (1 point) | No (0 point) |
|                        |                   | Manipulate with fingertip                                    | Yes (1 point) | No (0 point) |
|                        |                   | Manipulate in pressing and kneading                          | Yes (1 point) | No (0 point) |
|                        |                   | Manipulation diameter $\leq 2$ fingertip                     | Yes (1 point) | No (0 point) |
|                        | Acupoint Location | Between the lateral end of the eyebrow and the outer canthus | Yes (1 point) | No (0 point) |

|              |                        |                                               |               |              |
|--------------|------------------------|-----------------------------------------------|---------------|--------------|
|              |                        | In the depression of the infraorbital foramen | Yes (1 point) | No (0 point) |
|              | Strength Effectiveness | Sense of sore (Qi)                            | Yes (1 point) | No (0 point) |
|              | Rhythm                 | One movement in a beat                        | Yes (1 point) | No (0 point) |
| Scrape orbit | Manipulation           | Manipulate with index finger                  | Yes (1 point) | No (0 point) |
|              |                        | Manipulate with second phalangeal joint       | Yes (1 point) | No (0 point) |
|              |                        | Manipulate in scraping                        | Yes (1 point) | No (0 point) |
|              |                        | Scrape bone                                   | Yes (1 point) | No (0 point) |
|              | Acupoint Location      | On the bony structures of orbit               | Yes (1 point) | No (0 point) |
|              |                        | Include the whole orbit                       | Yes (1 point) | No (0 point) |
|              | Strength Effectiveness | Sense of sore (Qi)                            | Yes (1 point) | No (0 point) |
|              | Rhythm                 | One movement in 2 beat                        | Yes (1 point) | No (0 point) |
